# Supplementary material for: Association of Private Equity Acquisition of Physician Practices With Changes in Health Care Spending and Utilization
Source: PubMed Central journal article supplement (PMC9440392; doi:10.1001/jamahealthforum.2022.2886), 2022-09-02
Supplement: jamahealthforum-e222886-s001.pdf [file jamahealthforum-e222886-s001.pdf]

## Supplemental Online Content

Singh Y, Song Z, Polsky D, Bruch JD, Zhu JM. Association of private equity acquisition of physician practices with changes in health care spending and utilization. *JAMA Health Forum*. 2022;3(9):e222886. doi:10.1001/jamahealthforum.2022.2886

**eTable 1.** Definitions of outcomes

**eTable 2.** List of CPTs

**eTable 3.** Counts of practices and physicians identified as PE-acquired, by specialty and year

**eTable 4.** Characteristics of PE acquired and non-PE practices, before and after matching, 2015

**eFigure 1.** Unadjusted trends in primary outcomes for PE practices and matched controls

**eFigure 2.** Changes in practice patterns associated with PE acquisition, by quarter

**eTable 5.** Joint F-test of Pre-acquisition Trends

**eTable 6.** Characteristics of PE acquired and non-PE practices, 2015 (Matching on specialty type only)

**eTable 7.** Differential change in practice patterns for PE practices and matched controls (Matching on specialty type only)

**eTable 8.** Differential change in practice patterns for PE practices and matched controls (Unweighted)

**eTable 9.** Differential change in practice patterns for PE practices and matched controls (8 quarter preacquisition period)

**eFigure 3.** Changes in practice patterns associated with PE acquisition, by quarter (MSA fixed effects)

**eFigure 4.** Changes in practice patterns associated with PE acquisition, by quarter (practice and year fixed effects)

**eFigure 5.** Changes in practice patterns associated with PE acquisition, by quarter (Callaway & Sant'Anna (2021))

**eFigure 6.** Changes in practice patterns associated with PE acquisition, by quarter (Falsification test)

**eTable 10.** Differential change in practice patterns for PE practices and matched controls (Dermatology only)

**eTable 11.** Differential change in practice patterns for PE practices and matched controls (Gastroenterology only)

**eTable 12.** Differential change in practice patterns for PE practices and matched controls (Ophthalmology only)

**eFigure 7.** Differential change in volume and spending of select services – Dermatology

**eFigure 8.** Differential change in volume and spending of select services – Gastroenterology

**eFigure 9.** Differential change in volume and spending of select services – Ophthalmology

This supplemental material has been provided by the authors to give readers additional information about their work.

**eTable 1. Definitions of outcomes**

| <b>Variable</b>                             | <b>Definition</b>                                                                                                                                                               |
|---------------------------------------------|---------------------------------------------------------------------------------------------------------------------------------------------------------------------------------|
| Charge per claim                            | Sum of all chargemaster prices for a practice divided by the number of claims per practice, in a given quarter.                                                                 |
| Allowed amount per claim                    | Sum of all imputed allowed amounts for a practice divided by the number of claims per practice, in a given quarter.                                                             |
| Total no. of unique patients                | Number of unique patients, in a given practice-quarter.                                                                                                                         |
| Total no. of new patients                   | Number of patients in a practice who were not seen in the two years prior to the date of service, in a given practice-quarter.                                                  |
| Total no. of encounters                     | Total number of encounters, including claims with multiple encounters without any restrictions on type of service or care received (e.g., procedures, ancillary services, etc.) |
| Total no. of E&M visits                     | Total number of claims for Evaluation and Management (E&M) visits (Current Procedural Terminology (CPT) codes 99201-99215, 99241-99255, and 99499) in a given practice quarter. |
| Share of E&M visits >30 min (new patients)  | Total number of E&M visits for established patients (CPT codes 99201-99205) billed as longer than 30 minutes (CPT codes 99204-99205).                                           |
| Share of E&M visits >30 min (est. patients) | Total number of E&M visits for established patients (CPT codes 99211-99215) billed as longer than 30 minutes (CPT codes 99214-99215).                                           |
| Median Patient HCC Score                    | Median HCC score for all patients in a practice-year, using the HHS-HCC algorithm that uses claims from the year prior and the current year to estimate risk scores.            |

Notes: All outcomes are calculated by FAIR Health and aggregated to the practice-quarter level in compliance with FAIR Health confidentiality policies. Outcomes are averaged across claims among physicians who remained at each practice before and after acquisition.

**eTable 2. List of CPTs**

| <b>Service Category</b>                                  | <b>CPTs</b>                                                                                                                                                              |
|----------------------------------------------------------|--------------------------------------------------------------------------------------------------------------------------------------------------------------------------|
| Dermatology - Biopsies                                   | 11100 – 11107<br>11300 – 11313<br>40490, 69100                                                                                                                           |
| Dermatology - Pathology                                  | 88304 – 88305<br>88312, 88314                                                                                                                                            |
| Dermatology – E&M                                        | 99201 – 99215                                                                                                                                                            |
| Gastroenterology - Removal of Tumors, Polyps and Lesions | 43216, 43250, 44365, 44392, 45333, 45384,<br>43217, 43251, 44364, 44394, 45338, 45385,<br>43229, 43270, 44369, 44401, 45346, 45388                                       |
| Gastroenterology - EGD                                   | 43200 – 43205<br>43211 – 43217<br>43226 – 43227<br>43235 – 43236<br>43220, 43229, 43233, 43239, 43241<br>43243 – 43251<br>43254 – 43255<br>43266, 43270<br>91110 – 91111 |
| Gastroenterology – E&M                                   | 99201 – 99215                                                                                                                                                            |
| Ophthalmology – Cataract Extraction                      | 66982 – 66984                                                                                                                                                            |
| Ophthalmology – Diagnostic Imaging                       | 92250<br>92132 – 92134                                                                                                                                                   |
| Ophthalmology – Eye Exams                                | 92002 – 92004<br>92012 - 92014                                                                                                                                           |

**eTable 3.** Counts of practices and physicians identified as PE-acquired, by specialty and year

|                  | Count of Practices |            |            |            | Count of Physicians |            |            |             |
|------------------|--------------------|------------|------------|------------|---------------------|------------|------------|-------------|
|                  | Derm               | Gastro     | Ophtho     | Total      | Derm                | Gastro     | Ophtho     | Total       |
| 2016             | 33                 | 23         | 1          | 57         | 64                  | 87         | 2          | 153         |
| 2017             | 80                 | 12         | 25         | 117        | 149                 | 34         | 51         | 234         |
| 2018             | 72                 | 46         | 62         | 180        | 122                 | 119        | 139        | 380         |
| 2019             | 48                 | 78         | 97         | 223        | 92                  | 287        | 170        | 549         |
| 2020             | 0                  | 1          | 0          | 1          | 0                   | 171        | 0          | 171         |
| <b>All years</b> | <b>233</b>         | <b>160</b> | <b>185</b> | <b>578</b> | <b>427</b>          | <b>698</b> | <b>362</b> | <b>1487</b> |

Notes: Counts of practices represent the number of practices identified as being acquired by PE in the study period. Counts of physicians represent the number of unique National Provider Identifiers (NPIs) for MDs or DOs identified as being acquired by PE in the study period. Derm=Dermatology, Gastro=Gastroenterology, Ophtho=Ophthalmology.

**eTable 4: Characteristics of PE acquired and non-PE practices, before and after matching, 2015**

|                                                           | Before Matching |                  |                              | After Matching |                  |                              |
|-----------------------------------------------------------|-----------------|------------------|------------------------------|----------------|------------------|------------------------------|
|                                                           | Mean (SD)       |                  | Standardized Mean Difference | Mean (SD)      |                  | Standardized Mean Difference |
|                                                           | PE (N=578)      | Non-PE (N=2,874) |                              | PE (N=578)     | Non-PE (N=2,874) |                              |
| <b>Charge per claim</b>                                   | 323 (258)       | 434 (936)        | 0.16                         | 322 (258)      | 332 (326)        | 0.03                         |
| <b>Allowed amount per claim</b>                           | 187(135)        | 216 (340)        | 0.11                         | 187 (136)      | 178 (136)        | -0.06                        |
| <b>Total no. of unique patients</b>                       | 99 (197)        | 80 (164)         | -0.10                        | 94 (182)       | 88 (172)         | -0.03                        |
| <b>Total no. of new patients</b>                          | 76 (151)        | 60 (124)         | -0.10                        | 72 (136)       | 67 (132)         | -0.03                        |
| <b>Total no. of encounters</b>                            | 131 (261)       | 107 (215)        | -0.10                        | 124 (237)      | 118 (224)        | -0.02                        |
| <b>Total no. of E&amp;M visits</b>                        | 80 (202)        | 63 (161)         | -0.08                        | 75 (188)       | 72 (180)         | -0.01                        |
| <b>Share of E&amp;M visits &gt;30 min (new patients)</b>  | 0.26 (0.15)     | 0.26 (0.22)      | 0.02                         | 0.26 (0.15)    | 0.26 (0.21)      | 0.01                         |
| <b>Share of E&amp;M visits &gt;30 min (est. patients)</b> | 0.18 (0.17)     | 0.16 (0.20)      | -0.13                        | 0.19 (0.17)    | 0.18 (0.22)      | -0.02                        |
| <b>Median Patient HCC Score</b>                           | 1.26 (1.45)     | 1.38 (1.78)      | 0.07                         | 1.21 (1.05)    | 1.28 (1.10)      | 0.06                         |

Notes: Baseline characteristics for private equity acquired and non-acquired practices in 2015. Non-acquired practices represent independently owned physician practices identified using 5:1 caliper matching without replacement. Matching algorithm requires exact match on specialty (dermatology, ophthalmology, gastroenterology), and matches within 1 standard deviation for continuous covariates (total number of unique patients, total number of encounters, median HCC score, and average allowed amount). E&M=Evaluation and Management, HCC=Hierarchical Condition Category.

**eFigure 1: Unadjusted trends in primary outcomes for PE practices and matched controls**

(a) Total spending per practice

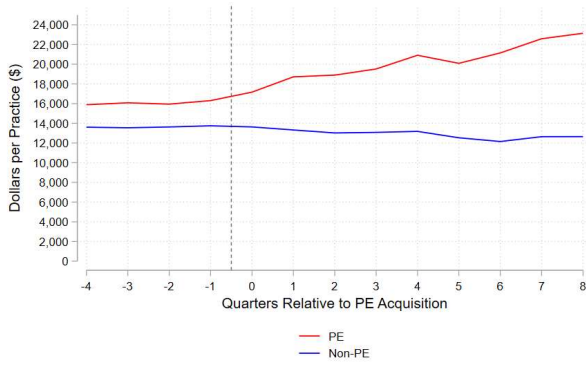

(b) Allowed amount per claim

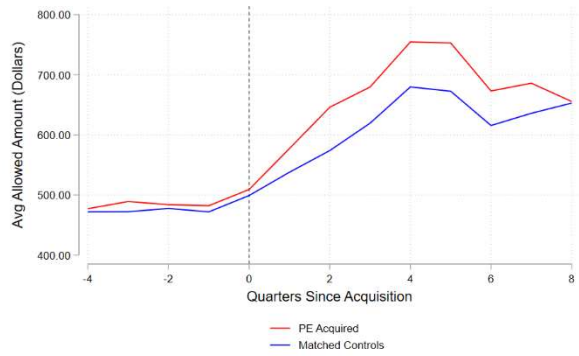

(c) Charges per claim

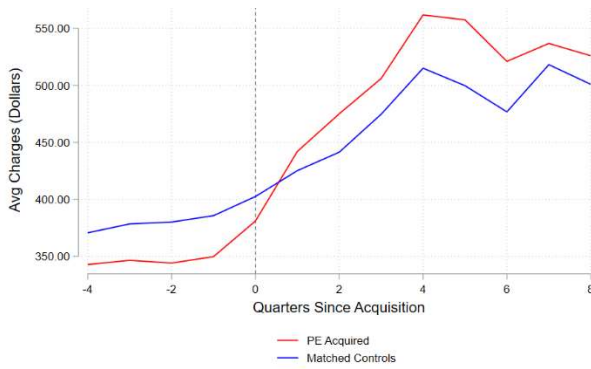

(d) Total number of E&M visits

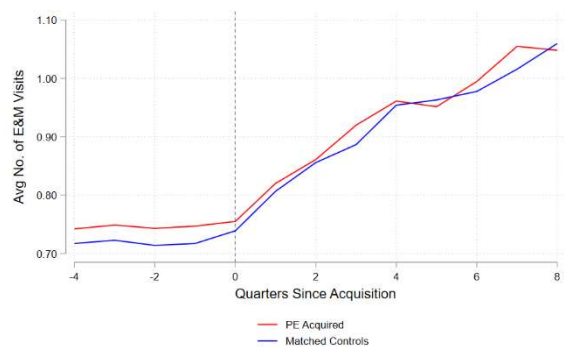

(e) Total number of encounters

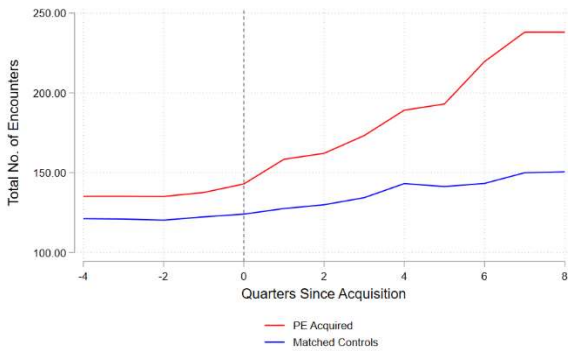

(f) Median HCC score

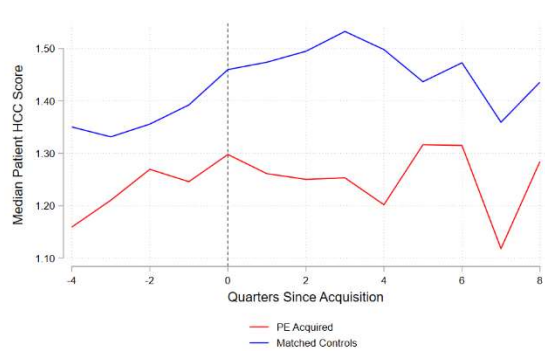

(g) E&M visits longer than 30 min (New)

(h) E&M visits longer than 30 min (Est)

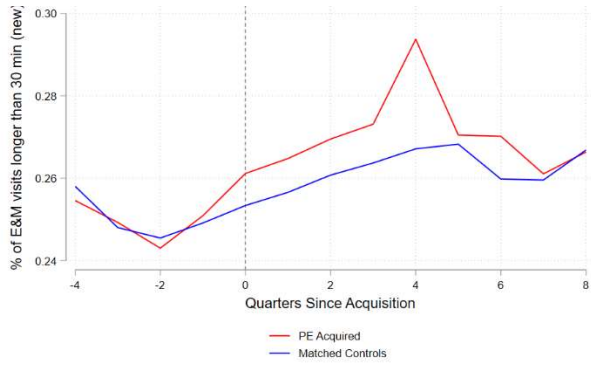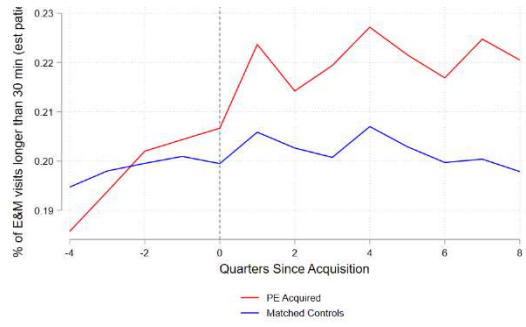

Notes: eFigure 1 presents unadjusted outcomes of interest for PE practices and matched controls. For matched controls, the quarter of acquisition represents the quarter in which the PE practice in the match cohort was acquired. The vertical dash line represents the quarter of acquisition.



**eFigure 2 (a)-(f): Changes in practice patterns associated with PE acquisition, by quarter**

(a) Charges per claim

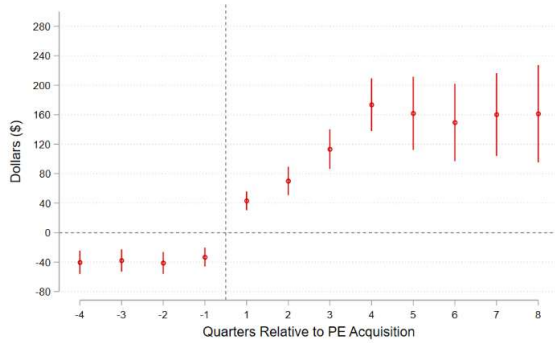

(b) Total number of encounters

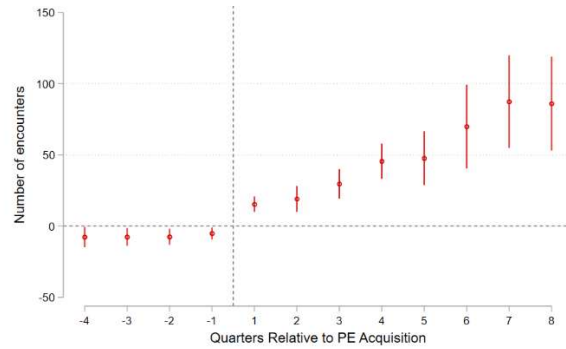

(c) Total number of E&M visits

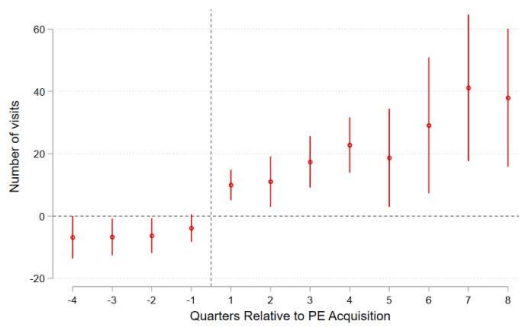

(d) Median HCC score

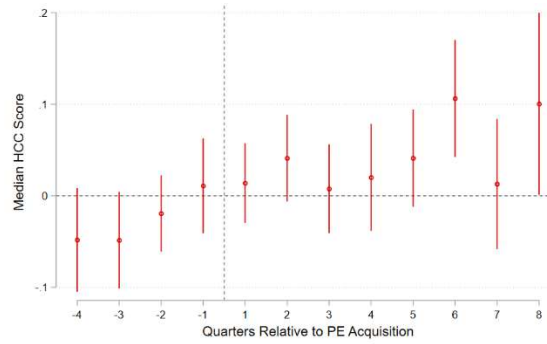

(e) E&M visits longer than 30 min (New)

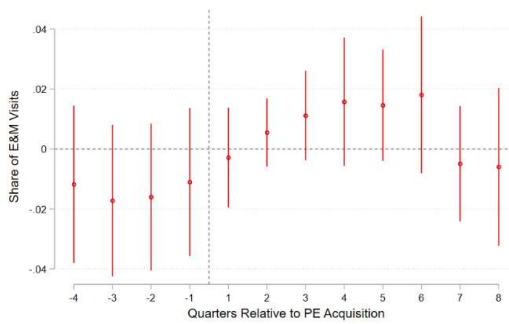

(f) E&M visits longer than 30 min (Established)

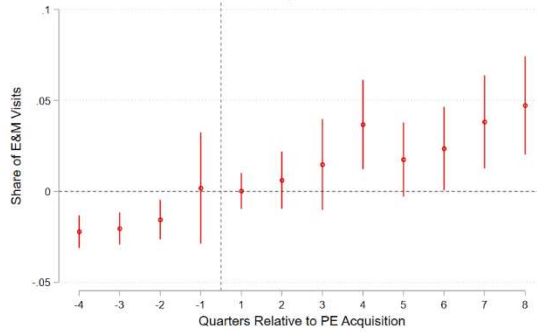

Notes: eFigure 2 presents event study coefficients corresponding to PE acquisition of physician practices. In the event study regression, we compared outcomes in PE-acquired practices with that of matched controls. Each point in the respective figure panels represents the coefficient obtained by estimating an event study regression which includes specialty fixed effects and with the unit of analysis at the practice-quarter level. The vertical dash line represents the quarter of acquisition that serves as the reference period. Event time 0 denoted the quarter of acquisition. We looked back up to 4 quarters prior to acquisition (event time -4, ..., -1) and 8 quarters after (event time +1, +2, ..., +8). Standard errors are clustered at the level of the matched cohort. Increases in confidence intervals in later quarters are explained by reductions in sample size.

**eTable 5. Joint F-test of Pre-acquisition Time Period, 2012-2017**

| <b>Outcome</b>                              | <b>F-statistic (P-value)</b> |
|---------------------------------------------|------------------------------|
| Total spending                              | 0.89 (0.44)                  |
| Charge per claim                            | 1.84 (0.13)                  |
| Allowed amount per claim                    | 0.97 (0.40)                  |
| Total no. of unique patients                | 0.90 (.044)                  |
| Total no. of new patients                   | 3.46 (0.01)                  |
| Total no. of encounters                     | 0.51 (0.67)                  |
| Total no. of E&M visits                     | 0.81 (0.49)                  |
| Share of E&M visits >30 min (new patients)  | 0.93 (0.42)                  |
| Share of E&M visits >30 min (est. patients) | 1.05 (0.37)                  |
| Median Patient HCC Score                    | 1.98 (0.11)                  |

Note: Authors' analysis of FAIR Health data. We tested for differences in pre-acquisition trends between PE-acquired and non-PE practices by performing a joint F-Test of the hypothesis that pre-acquisition interactions between the treatment and time indicators were no different.

**eTable 6: Characteristics of PE acquired and non-PE practices in 2015 (Matching on specialty type only)**

|                                                       | Mean (SD)               |                               | Standardized Mean Difference |
|-------------------------------------------------------|-------------------------|-------------------------------|------------------------------|
|                                                       | PE Practices<br>(N=579) | Non-PE Practices<br>(N=2,890) |                              |
| Average charges per claim                             | 322 (258)               | 433 (772)                     | 0.19                         |
| Average allowed amount per claim                      | 187 (136)               | 219 (288)                     | 0.14                         |
| Total no. of unique patients                          | 96 (188)                | 88 (179)                      | -0.04                        |
| Total no. of new patients                             | 73 (141)                | 67 (137)                      | -0.04                        |
| Total no. of encounters                               | 126 (249)               | 118 (236)                     | -0.03                        |
| Total no. of E&M visits                               | 78 (200)                | 71 (185)                      | -0.03                        |
| Share of E&M visits >30 min<br>(New patients)         | 0.26 (0.15)             | 0.26 (0.21)                   | 0.001                        |
| Share of E&M visits >30 min<br>(Established patients) | 0.19 (0.17)             | 0.18 (0.22)                   | -0.01                        |
| Median Patient HCC Score                              | 1.25 (1.45)             | 1.54 (2.01)                   | 0.16                         |

Notes: Baseline characteristics for PE acquired and non-acquired practices in 2015, prior to any acquisition in our analytic sample, based on exact matching within specialty type only. Of the 578 PE-acquired facilities in our sample, 576 (99.1%) were matched with a full set of five matched controls. E&M=Evaluation and Management, HCC=Hierarchical Condition Category.

**eTable 7: Differential change in practice patterns for PE and control practices (Matching on specialty type only)**

|                                                  | PE    |       | Controls |       | Unadjusted   | Adjusted     |                     |         |
|--------------------------------------------------|-------|-------|----------|-------|--------------|--------------|---------------------|---------|
|                                                  | Pre   | Post  | Pre      | Post  | Diff-in-diff | Diff-in-diff | % [95% C.I.]        | p-value |
| Allowed amount per claim, \$                     | 206   | 285   | 227      | 294   | 12.0         | 17.8         | 8.6 [2.7, 14.6]     | < 0.01  |
| <b>Utilization</b>                               |       |       |          |       |              |              |                     |         |
| Unique patients                                  | 104   | 147   | 91       | 105   | 29.0         | 28.4         | 28.4 [17.3, 37.3]   | < 0.01  |
| New patients                                     | 56    | 88    | 46       | 56    | 22.0         | 22.6         | 22.6 [27.9, 53.0]   | < 0.01  |
| <b>Practice Patterns</b>                         |       |       |          |       |              |              |                     |         |
| Charges per claim, \$                            | 353   | 512   | 436      | 576   | 19.0         | 58.8         | 16.7 [8.7, 24.7]    | < 0.01  |
| Patient HCC score                                | 1.29  | 1.30  | 1.52     | 1.55  | -0.02        | 0.02         | 1.6 [-1.8, 6.1]     | 0.29    |
| E&M visits >30 minutes (established patients), % | 0.20  | 0.22  | 0.20     | 0.20  | 0.02         | 0.02         | 10.0 [3.9, 18.7]    | < 0.01  |
| E&M visits >30 minutes (new patients), %         | 0.25  | 0.27  | 0.26     | 0.27  | 0.01         | 0.01         | 4.0 [-2.8, 12.9]    | 0.21    |
| Evaluation & Management visits                   | 85.8  | 115.4 | 74.7     | 86.9  | 17.5         | 30.2         | 35.2 [-52.4, 122.8] | 0.43    |
| Encounters                                       | 137.0 | 190.5 | 122.1    | 140.0 | 35.8         | 89.6         | 65.4 [0.1, 130.7]   | 0.05    |

Notes: eTable 6 shows unadjusted and adjusted differential changes in outcome variables averaged at the practice level for PE practices and matched controls, based on exact matching on specialty type alone. Adjusted regression coefficients are estimated using a linear difference-in-differences model that includes specialty fixed effects and is weighted by average patient volume per practice over the study period. Standard errors are clustered at the level of the matched cohort. Regressions with measures of patient volume as dependent variables (i.e., total number of unique patients and total number of new patients) are unweighted. Adjusted percentage differential change is calculated by dividing the adjusted differential change, obtained from the difference-in-differences regression, by the preacquisition mean for PE-acquired practices. E&M=Evaluation and Management, HCC=Hierarchical Condition Category. Diff-in-diff is the difference in differences between PE and controls or the differential change.

**eTable 8: Differential change in practice patterns for PE and control practices (Unweighted)**

|                                                  | PE    |       | Controls |       | Unadjusted   | Adjusted     |                    |         |
|--------------------------------------------------|-------|-------|----------|-------|--------------|--------------|--------------------|---------|
|                                                  | Pre   | Post  | Pre      | Post  | Diff-in-diff | Diff-in-diff | % [95% C.I.]       | p-value |
| Allowed amount per claim, \$                     | 206.0 | 285.0 | 201.0    | 260.0 | 20.0         | 19.7         | 9.6 [5.2, 14.0]    | <0.01   |
| <b>Utilization</b>                               |       |       |          |       |              |              |                    |         |
| Unique patients                                  | 105.0 | 147.0 | 93.0     | 108.0 | 27.0         | 27.1         | 25.8 [15.8, 35.6]  | <0.01   |
| New patients                                     | 57.0  | 89.0  | 47.0     | 57.0  | 22.0         | 21.6         | 37.9 [25.6, 50.2]  | <0.01   |
| <b>Practice Patterns</b>                         |       |       |          |       |              |              |                    |         |
| Charges per claim, \$                            | 353.0 | 514.0 | 372.0    | 474.0 | 59.0         | 57.1         | 16.2 [10.6, 21.8]  | <0.01   |
| Patient HCC score                                | 1.2   | 1.3   | 1.4      | 1.5   | -0.1         | -0.08        | -6.6 [-13.2, -0.1] | 0.04    |
| E&M visits >30 minutes (established patients), % | 0.2   | 0.2   | 0.2      | 0.2   | 0.0          | 0.02         | 9.6 [4.1, 15.0]    | <0.01   |
| E&M visits >30 minutes (new patients), %         | 0.3   | 0.3   | 0.3      | 0.3   | 0.0          | 0.01         | 2.7 [-1.1, 6.5]    | 0.16    |
| Evaluation & Management visits                   | 86.3  | 115.7 | 77.0     | 90.2  | 16           | 16.3         | 18.8 [7.1, 30.6]   | <0.01   |
| Encounters                                       | 138.1 | 191.1 | 123.8    | 143.5 | 33           | 33.4         | 24.2 [14.5, 33.8]  | <0.01   |

Notes: Unadjusted and adjusted differential changes in outcome variables averaged at the practice level for PE practices and matched controls, using unweighted linear difference-in-differences model that includes specialty fixed effects. Standard errors are clustered at the level of the matched cohort. Adjusted percentage differential change is calculated by dividing the adjusted differential change obtained from the difference-in-differences regression, by the preacquisition mean for PE-acquired practices. E&M=Evaluation and Management, HCC=Hierarchical Condition Category. Diff-in-diff is the difference in differences between PE and controls or the differential change.

**eTable 9: Differential change in practice patterns for PE and control practices (8 quarter preacquisition period)**

|                                                  | PE    |       | Controls |       | Unadjusted   | Adjusted     |                        |         |
|--------------------------------------------------|-------|-------|----------|-------|--------------|--------------|------------------------|---------|
|                                                  | Pre   | Post  | Pre      | Post  | Diff-in-diff | Diff-in-diff | %<br>[95% C.I.]        | p-value |
| Allowed amount per claim, \$                     | 199   | 285   | 197      | 260   | 23           | 25.0         | 12.6<br>[6.8, 18.3]    | < 0.01  |
| <b>Utilization</b>                               |       |       |          |       |              |              |                        |         |
| Unique patients                                  | 102   | 147   | 91       | 108   | 28           | 28.2         | 27.7<br>[16.6, 38.7]   | < 0.01  |
| New patients                                     | 57    | 89    | 47       | 57    | 22           | 22.3         | 39.2<br>[25.8, 52.6]   | < 0.01  |
| <b>Practice Patterns</b>                         |       |       |          |       |              |              |                        |         |
| Charges per claim, \$                            | 341.0 | 514.0 | 365.0    | 474.0 | 64.0         | 76.0         | 22.3<br>[14.8, 29.8]   | < 0.01  |
| Patient HCC score                                | 1.3   | 1.3   | 1.4      | 1.5   | -0.1         | 0.00         | 0.4<br>[-3.8, 4.6]     | 0.85    |
| E&M visits >30 minutes (established patients), % | 0.20  | 0.22  | 0.20     | 0.20  | 0.02         | 0.02         | 11.1<br>[2.8, 19.4]    | < 0.01  |
| E&M visits >30 minutes (new patients), %         | 0.25  | 0.27  | 0.26     | 0.27  | 0.01         | 0.02         | 6.3<br>[-3.7, -16.2]   | 0.21    |
| Evaluation & Management visits                   | 81.7  | 115.7 | 74.7     | 90.2  | 18.5         | 35.5         | 43.5<br>[-60.1, 147.1] | 0.41    |
| Encounters                                       | 134.0 | 191.1 | 121.0    | 143.5 | 34.7         | 87.9         | 65.6<br>[-9.0, 140.1]  | 0.08    |

Notes: eTable 8 shows unadjusted and adjusted differential changes in outcome variables averaged at the practice level for PE practices and matched controls, based on a sensitivity analysis that extended the pre-acquisition period to 8 quarters, compared to 4 quarters in the main analysis. Post-acquisition period remains 8 quarters. E&M=Evaluation and Management, HCC=Hierarchical Condition Category. Diff-in-diff is the difference in differences between PE and controls or the differential change.

**eFigure 3: Changes in practice patterns associated with PE acquisition, by quarter (MSA fixed effects)**

(a) Total spending per practice

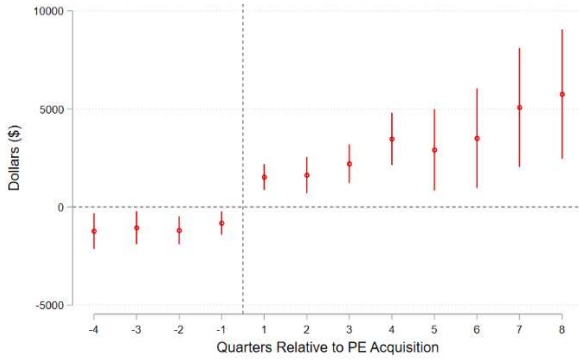

(b) Allowed amount per claim

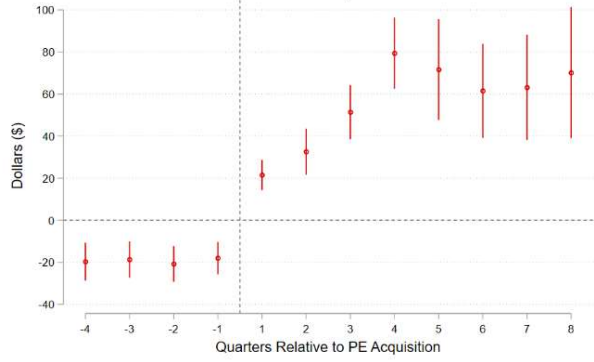

(c) Charges per claim

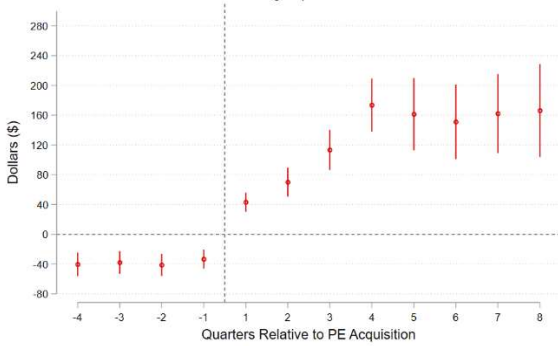

(d) Total number of E&M visits

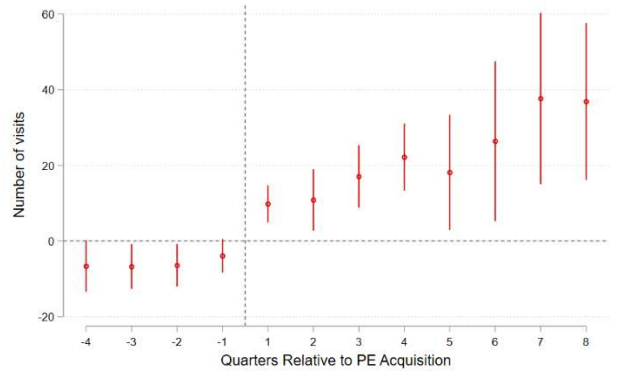

(e) Total number of encounters

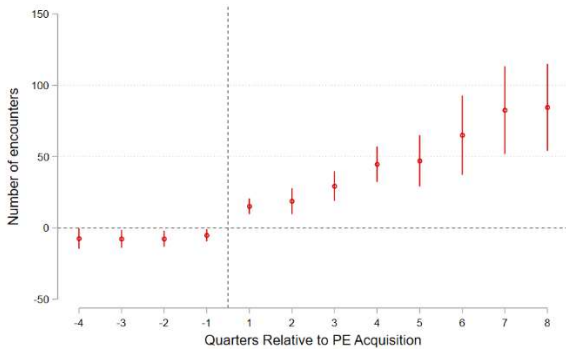

(f) Median HCC score

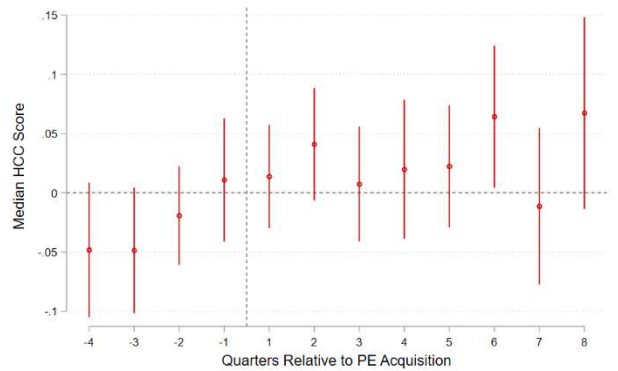

(g) E&M visits longer than 30 min (New)

(h) E&M visits longer than 30 min (Est)

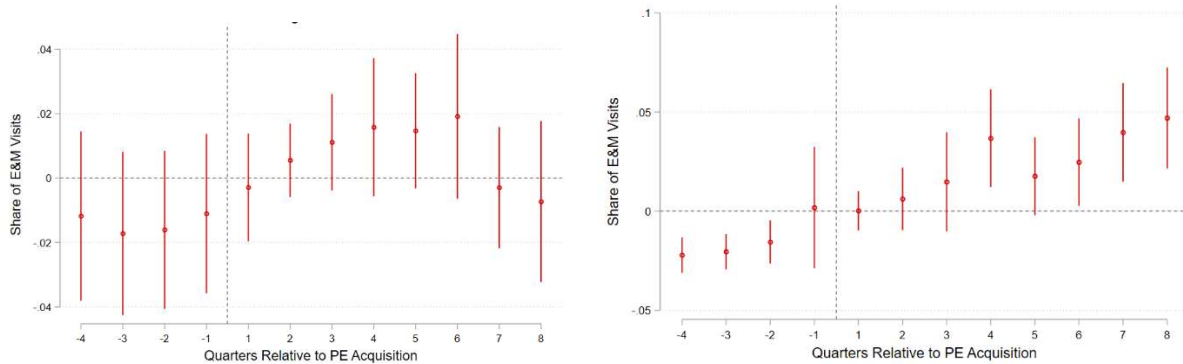

Notes: eFigure 3 presents event study coefficients corresponding to PE acquisition of physician practices. In the event study regression, we compared outcomes in PE-acquired practices with that of matched controls. Each point in the respective figure panels represents the coefficient obtained by estimating an event study regression which includes specialty and MSA fixed effects and with the unit of analysis at the practice-quarter level. The vertical dash line represents the quarter of acquisition that serves as the reference period. Event time 0 denoted the quarter of acquisition. We looked back up to 4 quarters prior to acquisition (event time -4, ..., -1) and 8 quarters after (event time +1, +2, ..., +8). Standard errors are clustered at the level of the matched cohort. Increases in confidence intervals in later quarters are explained by reductions in sample size.



**eFigure 4: Changes in practice patterns associated with PE acquisition, by quarter  
(Practice and year fixed effects)**

(a) Total spending per practice

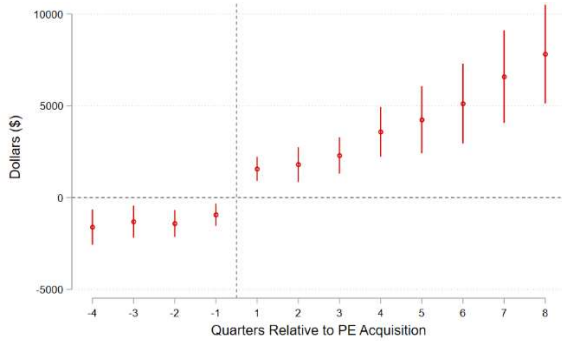

(b) Allowed amount per claim

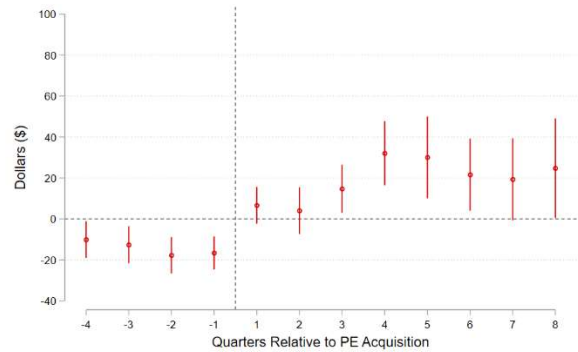

(c) Charges per claim

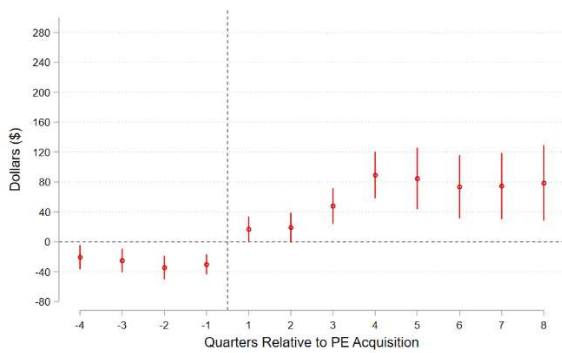

(d) Total number of E&M visits

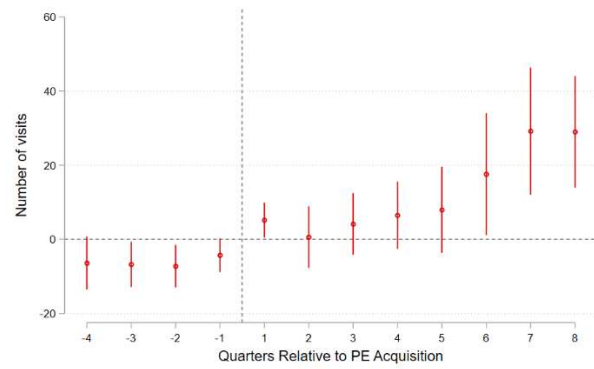

(e) Total number of encounters

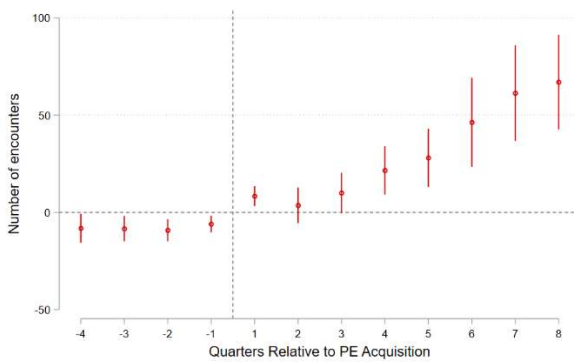

(f) Median HCC score

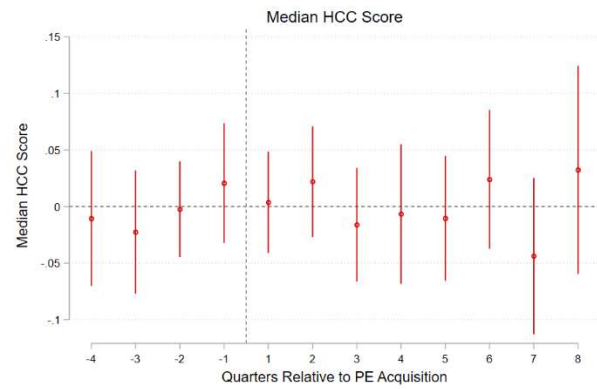

(g) E&M visits longer than 30 min (New)

(h) E&M visits longer than 30 min (Est)

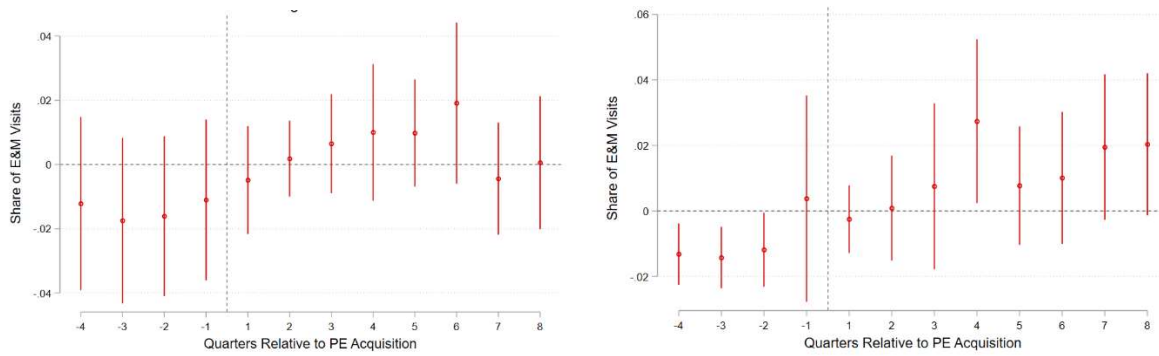

Notes: eFigure 4 presents event study coefficients corresponding to PE acquisition of physician practices. In the event study regression, we compared outcomes in PE-acquired practices with that of matched controls. Each point in the respective figure panels represents the coefficient obtained by estimating an event study regression which includes practice and year fixed effects and with the unit of analysis at the practice-quarter level. The vertical dash line represents the quarter of acquisition that serves as the reference period. Event time 0 denoted the quarter of acquisition. We looked back up to 4 quarters prior to acquisition (event time -4, ..., -1) and 8 quarters after (event time +1, +2, ..., +8). Standard errors are clustered at the level of the matched cohort. Increases in confidence intervals in later quarters are explained by reductions in sample size.

**eFigure 5: Changes in practice patterns associated with PE acquisition, by quarter (Callaway & Sant’Anna (2021))**

(a) Total spending per practice

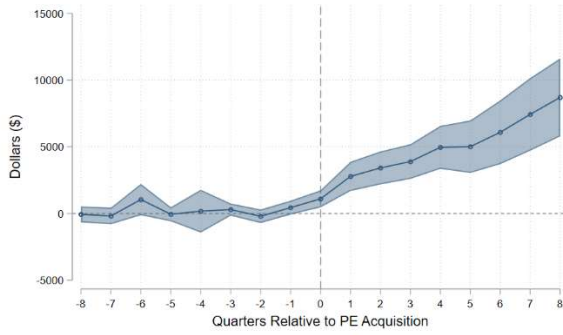

(b) Allowed amount per claim

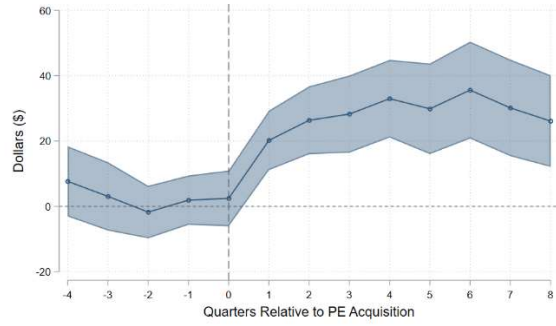

(c) Charges per claim

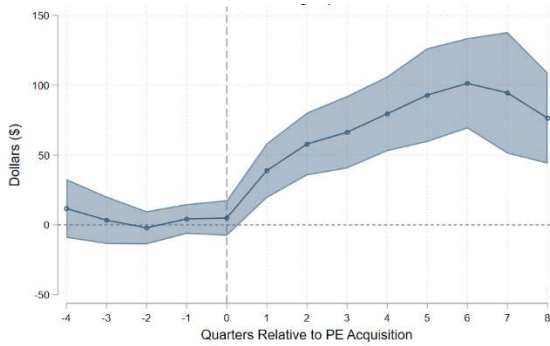

(d) Total number of E&M visits

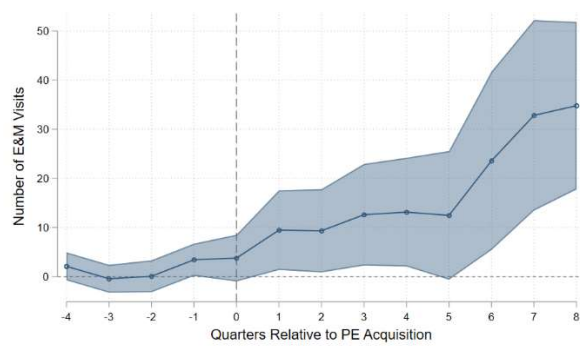

(e) Total number of encounters

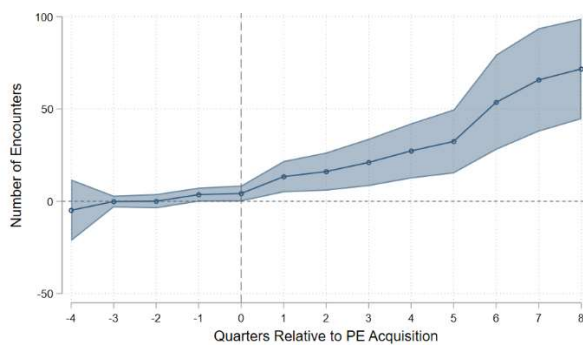

(f) Median HCC score

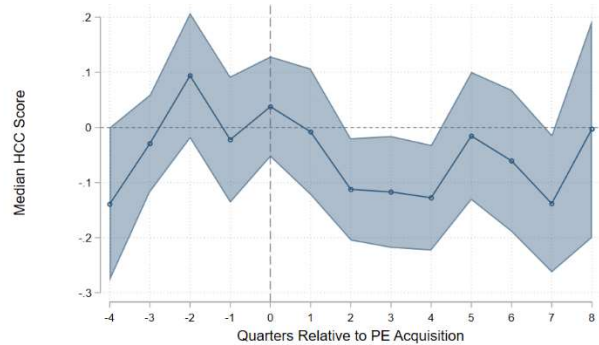

(g) E&M visits longer than 30 min (New)

(h) E&M visits longer than 30 min (Est)

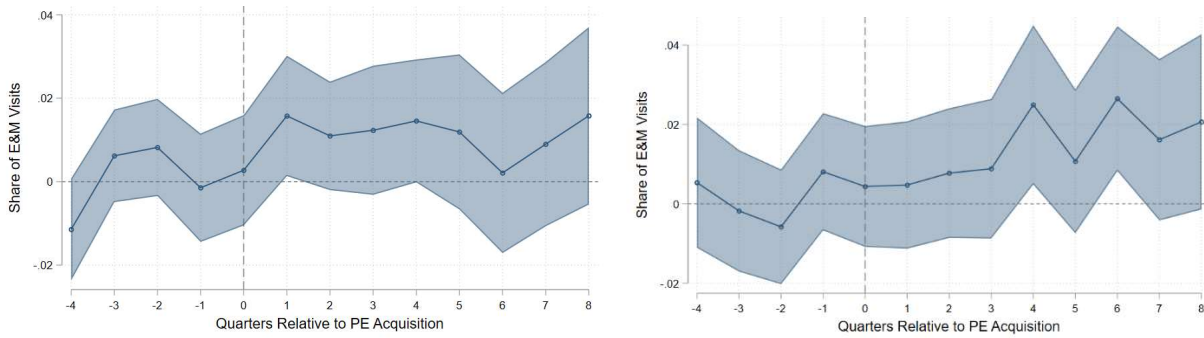

Notes: eFigure 5 presents event study coefficients corresponding to PE acquisition of physician practices. In the event study regression, we use the Callaway & Sant’Anna (2021) estimator that accounts for staggered adoption of treatment and heterogenous treatment effects. The vertical dash line represents the quarter of acquisition that serves as the reference period. Event time 0 denoted the quarter of acquisition. We looked back up to 4 quarters prior to acquisition (event time -4, ..., -1) and 8 quarters after (event time +1, +2, ..., +8). Standard errors are clustered at the level of the matched cohort. Increases in confidence intervals in later quarters are explained by reductions in sample size.

**eFigure 6: Changes in practice patterns associated with PE acquisition, by quarter (Falsification Test)**

(a) Total spending per practice

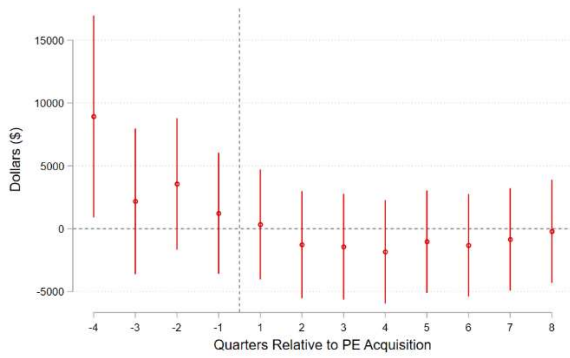

(b) Allowed amount per claim

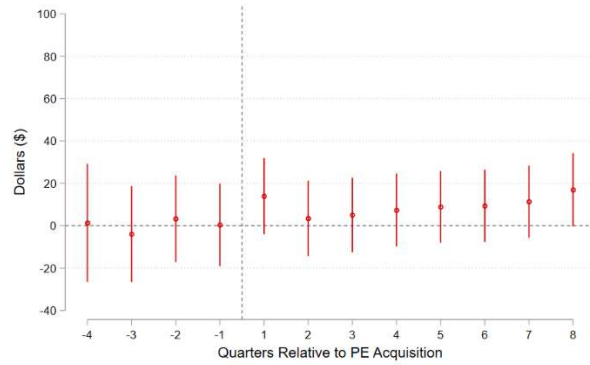

(c) Charges per claim

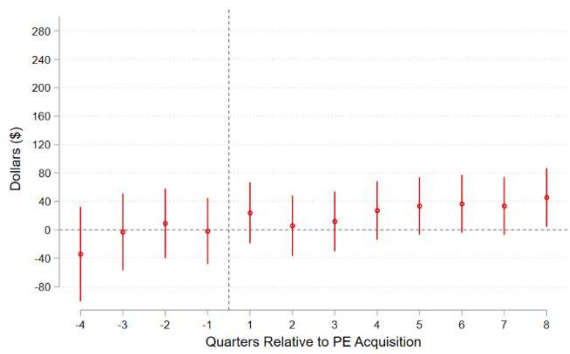

(d) Total number of E&M visits

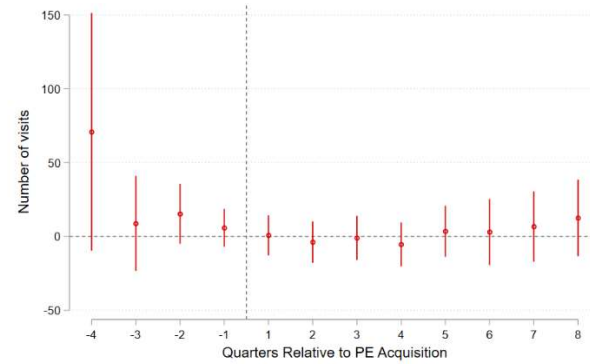

(e) Total number of encounters

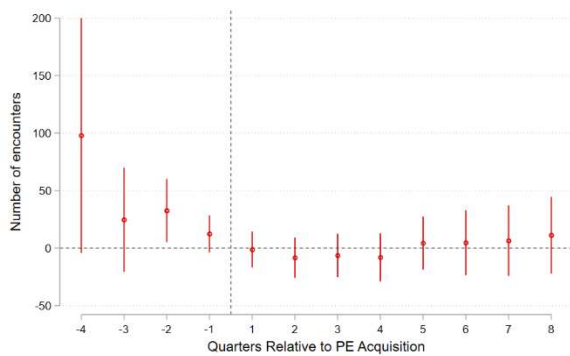

(f) Median HCC score

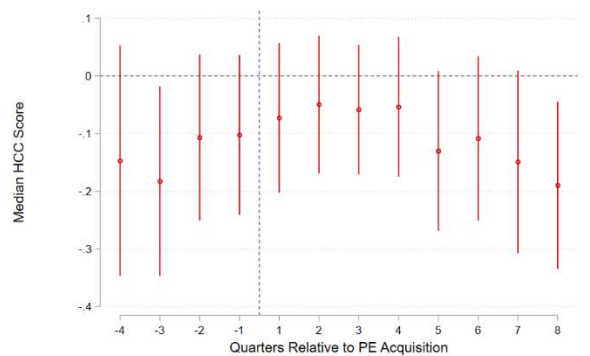

(g) E&M visits longer than 30 min (New)

(h) E&M visits longer than 30 min (Est)

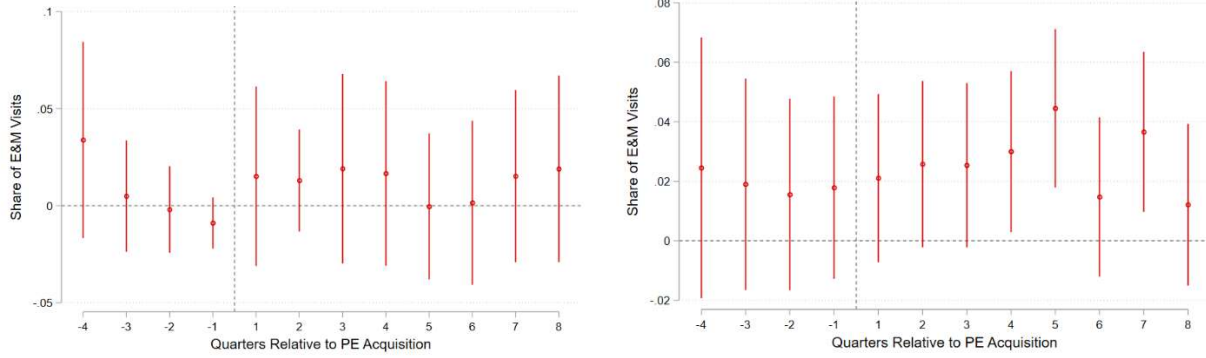

Notes: eFigure 6 presents event study coefficients corresponding to a falsification test where we assign a counterfactual acquisition date for all PE acquisition of physician practices and estimation treatment effects using a preacquisition (placebo) counterfactual acquisition date. The vertical dash line represents the quarter of acquisition that serves as the reference period. Event time 0 denoted the quarter of acquisition. We looked back up to 4 quarters prior to acquisition (event time -4, ..., -1) and 8 quarters after (event time +1, +2, ..., +8). Standard errors are clustered at the level of the matched cohort.

**eTable 10: Differential change in practice patterns for PE and control practices (Dermatology only)**

|                                                  | PE     |        | Controls |        | Unadjusted   | Adjusted     |                      |         |
|--------------------------------------------------|--------|--------|----------|--------|--------------|--------------|----------------------|---------|
|                                                  | Pre    | Post   | Pre      | Post   | Diff-in-diff | Diff-in-diff | % [95% C.I.]         | p-value |
| Allowed amount per claim, \$                     | 120    | 149    | 166      | 202    | -7           | 0.02         | 0.02<br>[-4.9, 4.9]  | 0.993   |
| <b>Utilization</b>                               |        |        |          |        |              |              |                      |         |
| Unique patients                                  | 148    | 180    | 124      | 132    | 24           | 24.858       | 16.8<br>[3.3, 30.3]  | 0.015   |
| New patients                                     | 79     | 106    | 62       | 67     | 22           | 21.933       | 27.7<br>[11.6, 43.8] | < 0.01  |
| <b>Practice Patterns</b>                         |        |        |          |        |              |              |                      |         |
| Charge per claim, \$                             | 202    | 300    | 312      | 380    | 30           | 37.76        | 20.0<br>[9.6, 30.4]  | < 0.01  |
| Patient HCC score                                | 0.87   | 0.88   | 1.03     | 1.08   | -0.04        | 0.00881      | 4.5<br>[-2.7, 11.5]  | 0.779   |
| E&M visits >30 minutes (established patients), % | 0.15   | 0.19   | 0.15     | 0.16   | 0.02         | 0.0319       | 21.1<br>[7.2, 34.8]  | < 0.01  |
| E&M visits >30 minutes (new patients), %         | 0.24   | 0.24   | 0.26     | 0.27   | 0.01         | 0.24648      | 3.4<br>[-2.8, 9.5]   | 0.28    |
| Evaluation & Management visits                   | 189.82 | 226.03 | 162.33   | 170.90 | 16.25        | 43.15        | 7.0<br>[-13.5, 10.2] | 0.503   |
| Encounters                                       | 156.87 | 186.41 | 127.78   | 135.93 | 33.37        | 62.388       | 8.6<br>[-10.8, 27.9] | 0.384   |

Notes: eTable 10 shows unadjusted and adjusted differential changes in outcome variables averaged at the practice level for dermatology practices acquired by PE. Post-acquisition period remains 8 quarters. E&M=Evaluation and Management, HCC=Hierarchical Condition Category. Diff-in-diff is the difference in differences between PE and controls or the differential change.

**eTable 11: Differential change in practice patterns for PE and control practices (Gastroenterology only)**

|                                                  | PE     |        | Controls |        | Unadjusted   | Adjusted     |                       |         |
|--------------------------------------------------|--------|--------|----------|--------|--------------|--------------|-----------------------|---------|
|                                                  | Pre    | Post   | Pre      | Post   | Diff-in-diff | Diff-in-diff | % [95% C.I.]          | p-value |
| Allowed amount per claim, \$                     | 328    | 512    | 294      | 398    | 80           | 114.09       | 32.2<br>[21.9, 42.5]  | < 0.01  |
| <b>Utilization</b>                               |        |        |          |        |              |              |                       |         |
| Unique patients                                  | 81     | 128    | 77       | 98     | 26           | 26.785       | 32.9<br>[16.6, 49.3]  | < 0.01  |
| New patients                                     | 54     | 88     | 47       | 60     | 21           | 32.931702    | 37.9<br>[21.1, 54.7]  | < 0.01  |
| <b>Practice Patterns</b>                         |        |        |          |        |              |              |                       |         |
| Charge per claim, \$                             | 578    | 901    | 553      | 731    | 145          | 224.9        | 35.7<br>[22.4,49.1]   | < 0.01  |
| Patient HCC score                                | 1.87   | 1.98   | 1.98     | 2.23   | -0.14        | 0.0046       | 0.3<br>[-7.6, 8.0]    | 0.957   |
| E&M visits >30 minutes (established patients), % | 0.30   | 0.31   | 0.31     | 0.30   | 0.02         | 0.02072      | 6.8<br>[0.9, 12.7]    | 0.023   |
| E&M visits >30 minutes (new patients), %         | 0.27   | 0.30   | 0.25     | 0.27   | 0.01         | 0.0089       | 3.3<br>[-2.7, 9.3]    | 0.277   |
| Evaluation & Management visits                   | 113.21 | 179.77 | 112.53   | 143.31 | 16.25        | 15.117       | 10.9<br>[-16.8, 38.6] | 0.439   |
| Encounters                                       | 59.70  | 97.40  | 68.07    | 88.76  | 33.37        | 62.1         | 23.1<br>[-8.8, 55.1]  | 0.155   |

Notes: eTable 11 shows unadjusted and adjusted differential changes in outcome variables averaged at the practice level for gastroenterology practices acquired by PE. Post-acquisition period remains 8 quarters. E&M=Evaluation and Management, HCC=Hierarchical Condition Category. Diff-in-diff is the difference in differences between PE and controls or the differential change.



**eTable 12: Differential change in practice patterns for PE and control practices (Ophthalmology only)**

|                                                  | PE    |        | Controls |        | Unadjusted   | Adjusted     |                        |         |
|--------------------------------------------------|-------|--------|----------|--------|--------------|--------------|------------------------|---------|
|                                                  | Pre   | Post   | Pre      | Post   | Diff-in-diff | Diff-in-diff | % [95% C.I.]           | p-value |
| Allowed amount per claim, \$                     | 209   | 284    | 162      | 221    | 16           | 11.87        | 7.1<br>[0.6, 13.5]     | 0.033   |
| <b>Utilization</b>                               |       |        |          |        |              |              |                        |         |
| Unique patients                                  | 72    | 116    | 68       | 83     | 29           | 28.544       | 39.5<br>[17.9, 61.2]   | < 0.01  |
| New patients                                     | 31    | 65     | 28       | 40     | 22           | 20.975       | 67<br>[30.2, 103.8]    | < 0.01  |
| <b>Practice Patterns</b>                         |       |        |          |        |              |              |                        |         |
| Charge per claim, \$                             | 349   | 486    | 285      | 382    | 40           | 39.54        | 12.4<br>[2.9, 22.0]    | 0.011   |
| Patient HCC score                                | 1.16  | 1.17   | 1.21     | 1.28   | -0.06        | 0.0527       | 4.5<br>[-2.7, 11.5]    | 0.219   |
| E&M visits >30 minutes (established patients), % | 0.18  | 0.18   | 0.17     | 0.18   | 0.02         | -0.0183      | -11.9<br>[-35.4, 11.5] | 0.316   |
| E&M visits >30 minutes (new patients), %         | 0.25  | 0.30   | 0.25     | 0.27   | 0.01         | 0.04353      | 21.0<br>[-23.7, 65.8]  | 0.355   |
| Evaluation & Management visits                   | 94.51 | 150.66 | 86.15    | 104.77 | 16.25        | 13.241       | 17.5<br>[-5.0, 39.9]   | 0.126   |
| Encounters                                       | 20.46 | 30.01  | 22.19    | 26.97  | 33.37        | 190.65       | 44.0<br>[14.5, 73.5]   | < 0.01  |

Notes: eTable 12 shows unadjusted and adjusted differential changes in outcome variables averaged at the practice level for ophthalmology practices acquired by PE. Post-acquisition period remains 8 quarters. E&M=Evaluation and Management, HCC=Hierarchical Condition Category. Diff-in-diff is the difference in differences between PE and controls or the differential change.

**eFigure 7. Differential change in volume and spending of select services – Dermatology**

(a) No. of services- Biopsies

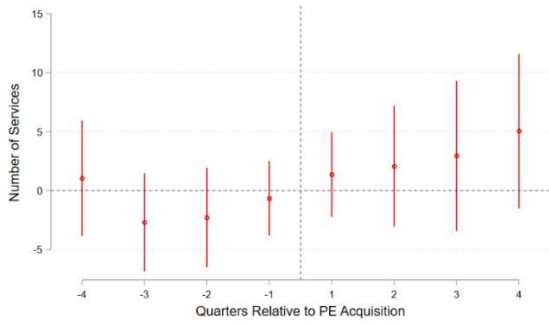

(b) Total Spending - Biopsies

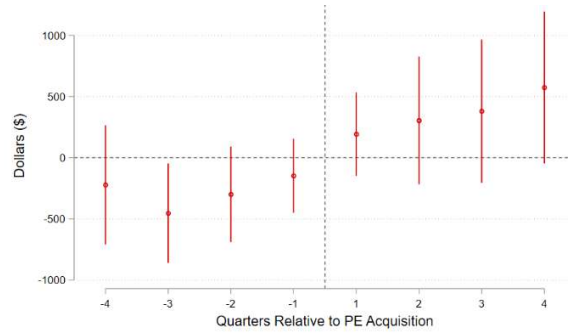

(c) No. of services- Pathology

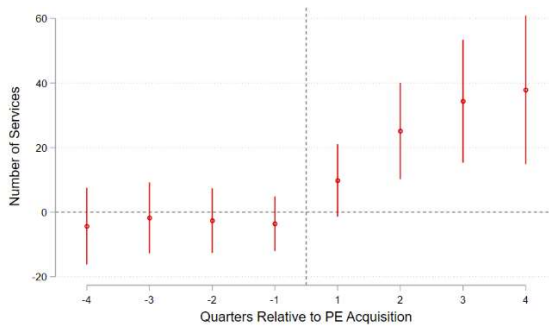

(d) Total Spending - Pathology

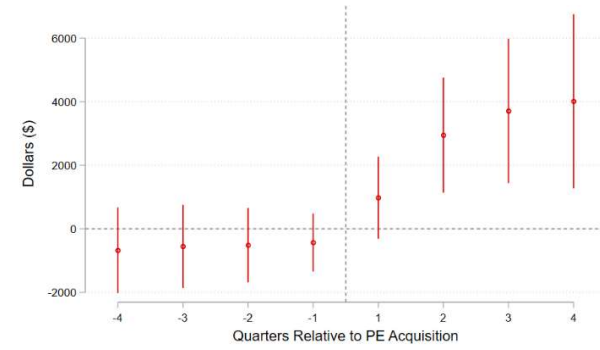

(e) No. of services- E&M Visits

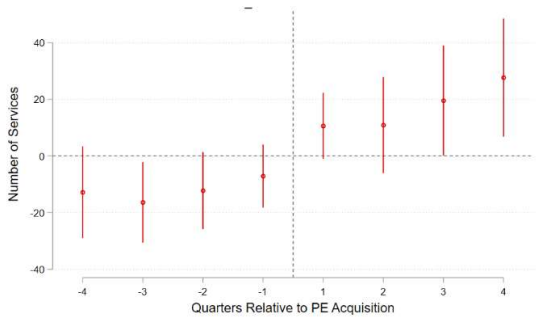

(f) Total Spending – E&M Visits

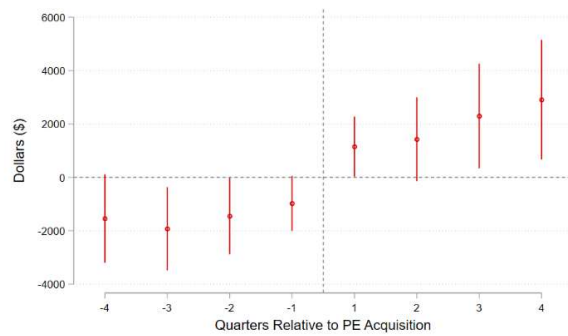

Notes: eFigure 7 presents event study coefficients corresponding to PE acquisition of dermatology physician practices. In the event study regression, we compared spending and volume for select services in PE-acquired practices with that of matched controls. Each point in the respective figure panels represents the coefficient obtained by estimating an event study regression which includes MSA fixed effects and with the unit of analysis at the practice-quarter level. Standard errors are clustered at the level of the matched cohort.

**eFigure 8. Differential change in volume and spending of select services – Gastroenterology**

(a) No. of services- Removal of tumors

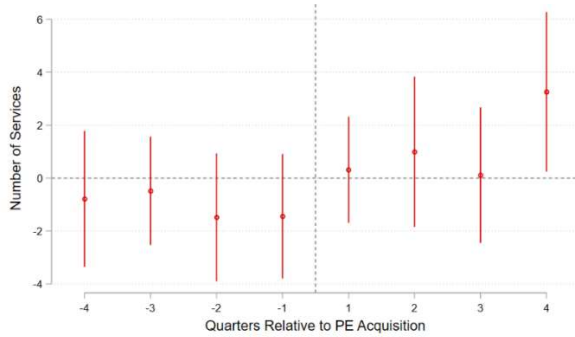

(b) Total Spending - Removal of tumors

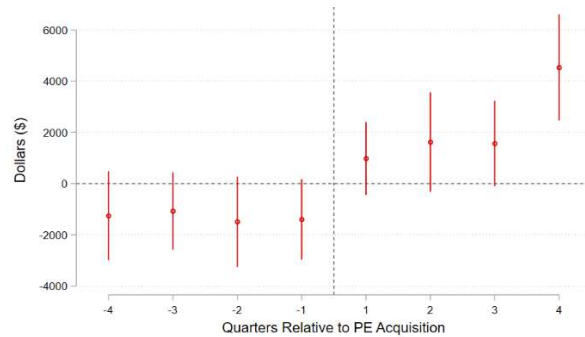

(c) No. of services- EGD

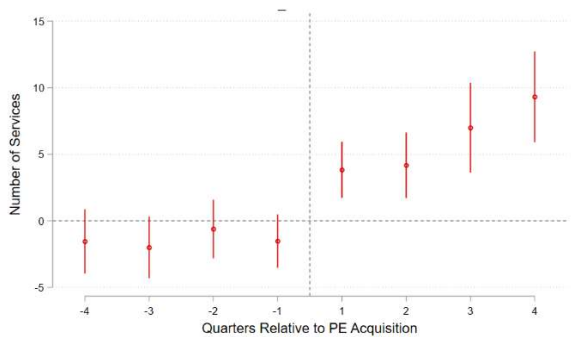

(d) Total Spending - EGD

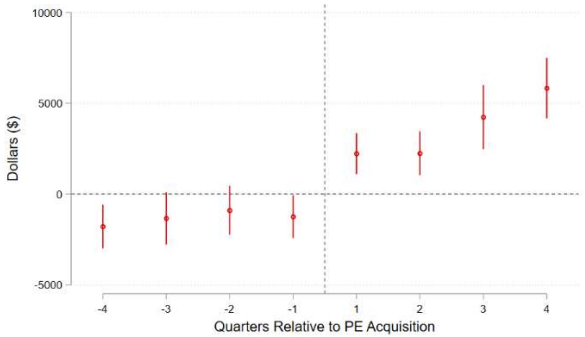

(e) No. of services- E&M Visits

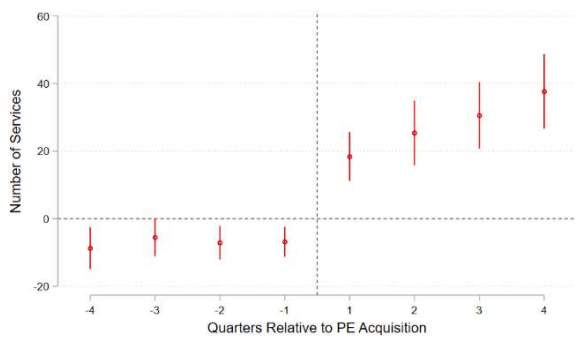

(f) Total Spending – E&M Visits

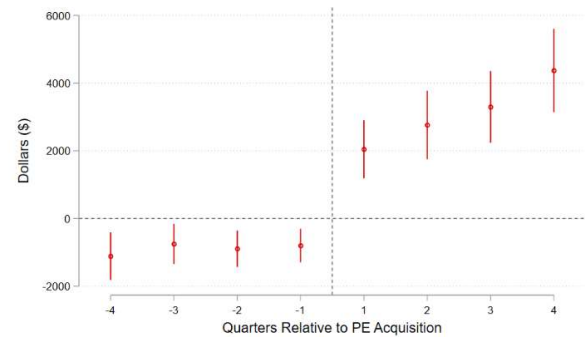

Notes: eFigure 8 presents event study coefficients corresponding to PE acquisition of gastroenterology physician practices. In the event study regression, we compared spending and volume for select services in PE-acquired practices with that of matched controls. Each point in the respective figure panels represents the coefficient obtained by estimating an event study regression which includes MSA fixed effects and with the unit of analysis at the practice-quarter level. Standard errors are clustered at the level of the matched cohort.

**eFigure 9. Differential change in volume and spending of select services – Ophthalmology**

(a) No. of services – Cataract Extraction

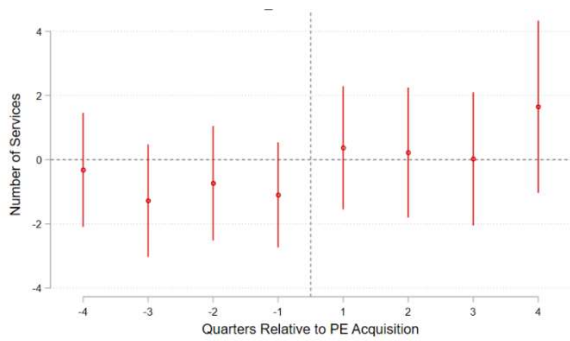

(b) Total Spending - Cataract Extraction

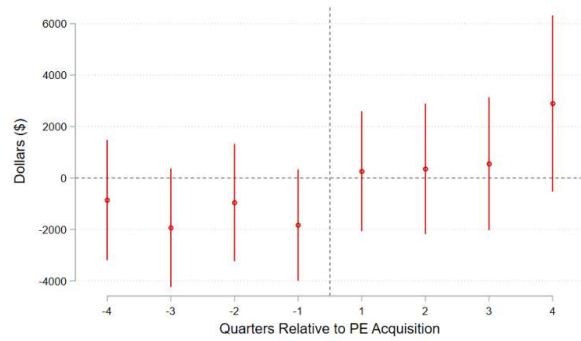

(c) No. of services- Diagnostic Imaging

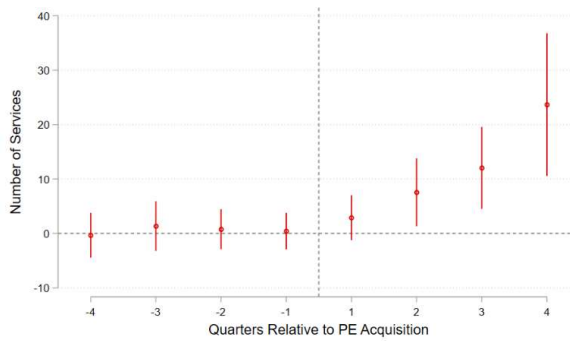

(d) Total Spending – Diagnostic Imaging

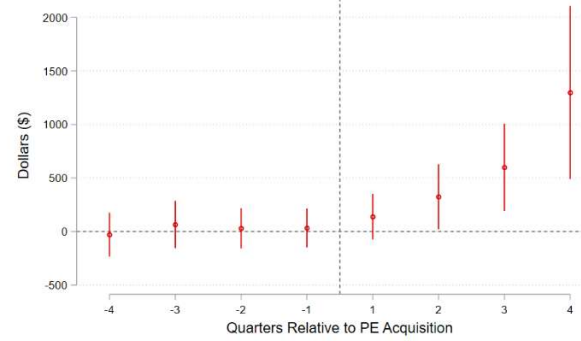

(e) No. of services- Eye Exams

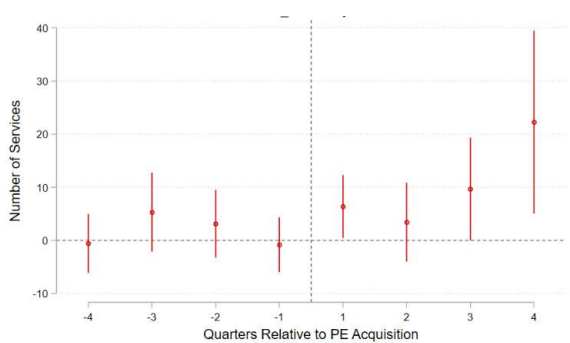

(f) Total Spending – Eye Exams

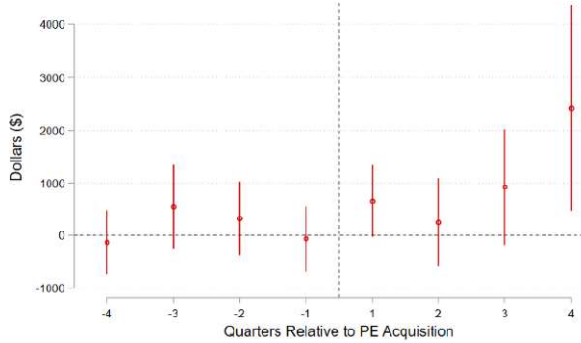

Notes: eFigure 9 presents event study coefficients corresponding to PE acquisition of ophthalmology physician practices. In the event study regression, we compared spending and volume for select services in PE-acquired practices with that of matched controls. Each point in the respective figure panels represents the coefficient obtained by estimating an event study regression which includes MSA fixed effects and with the unit of analysis at the practice-quarter level. Standard errors are clustered at the level of the matched cohort.
